# Supplementary material for: The impact of ship emissions on air quality and human health in the Gothenburg area – Part I: 2012 emissions
Source: Copernicus journal article supplement (doi:10.5194/acp-2020-94), 2020-02-18
Supplement: Supplementary file 1 [file acp-2020-94-supplement.pdf]

*Supplement to*

**The impact of ship emissions on air quality and human health  
in the Gothenburg area - Part I: 2012 emissions**

Lin Tang et al.

Correspondence to: Jana Moldanová ([jana.moldanova@ivl.se](mailto:jana.moldanova@ivl.se)) and Lin Tang ([lin.tang@wsp.com](mailto:lin.tang@wsp.com))

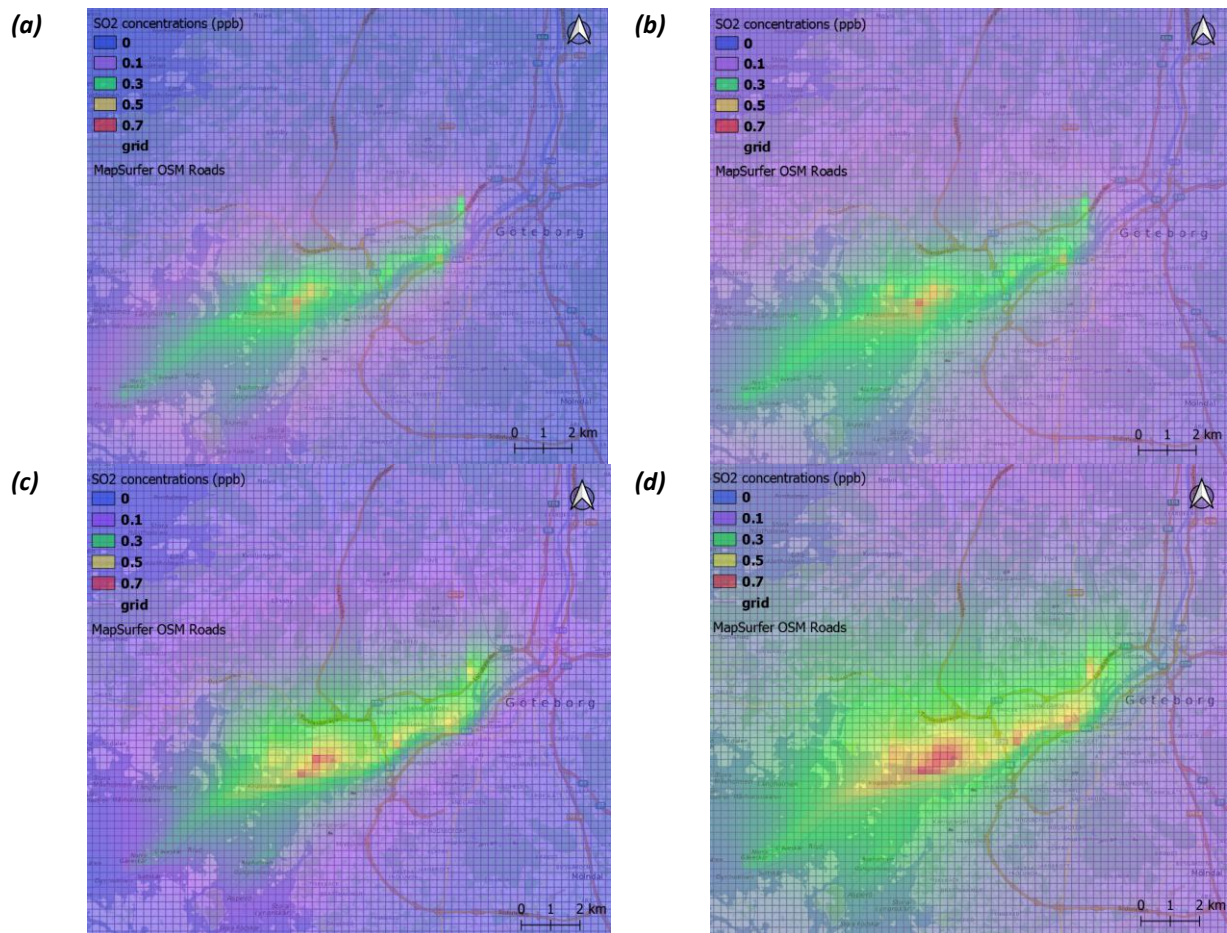

**S 1: Contributions of shipping to air concentrations of SO<sub>2</sub> as mean of winter months, DJF (ppb) and summer months, JJA (ppb) in year 2012: (a) Local shipping contribution in winter; (b) Local and regional shipping contributions in winter; (c) Local shipping contribution in summer; (d) Local and regional shipping contributions in summer. Base map credits: © OpenStreetMap contributors (openstreetmap.org). Distributed under a Creative Commons BY-SA License.**

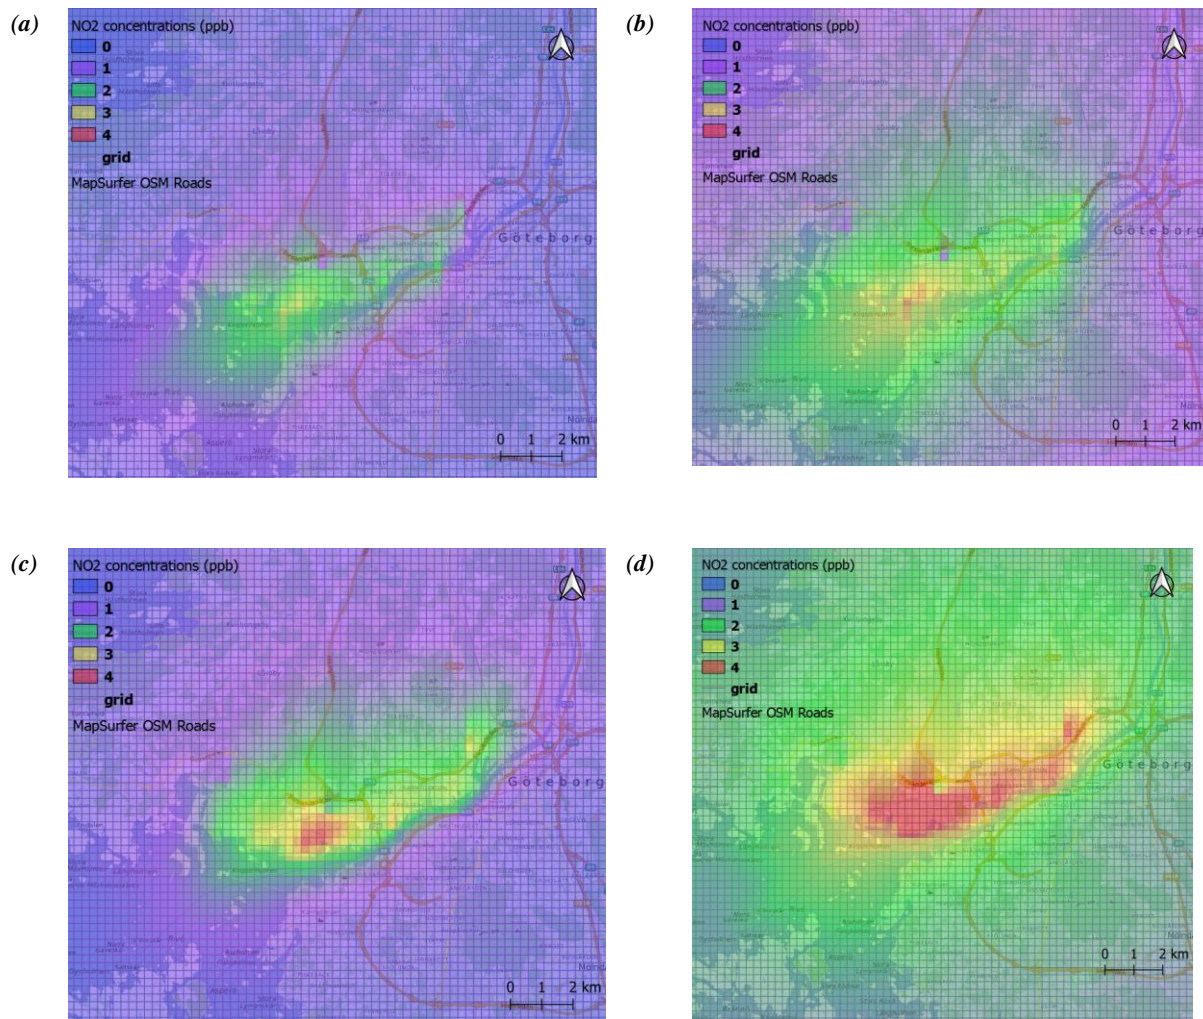

**S 2: Contributions of shipping to air concentration of NO<sub>2</sub> as mean of winter months, DJF (ppb) and summer months, JJA (ppb) in year 2012: (a) Local shipping contribution in winter; (b) Local and regional shipping contributions in winter; (c) Local shipping contribution in summer; (d) Local and regional shipping contributions in summer. Base map credits: © OpenStreetMap contributors (openstreetmap.org). Distributed under a Creative Commons BY-SA License.**



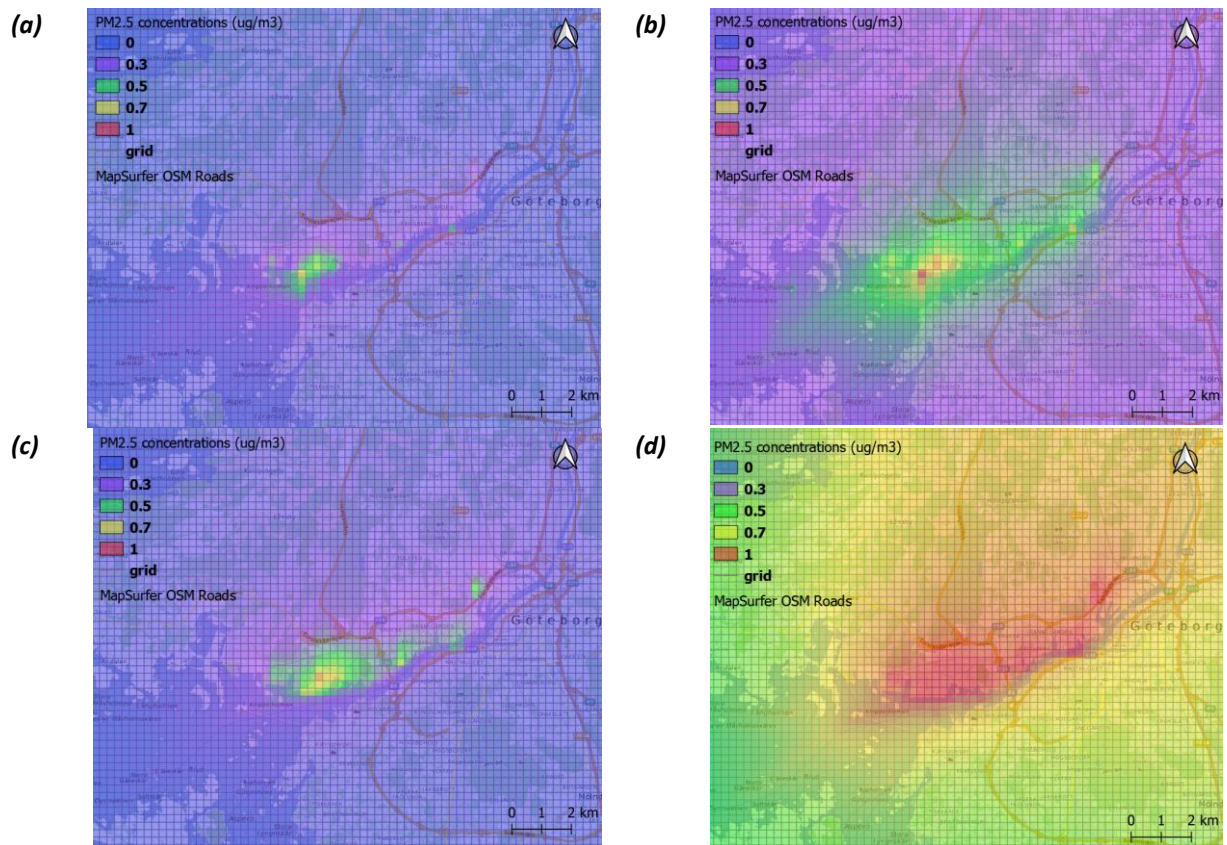

**S 3: Contributions of shipping to air concentration of PM<sub>2.5</sub> as mean of winter months, DJF ( $\mu\text{g m}^{-3}$ ) and summer months, JJA ( $\mu\text{g m}^{-3}$ ) in year 2012: (a) Local shipping contribution in winter; (b) Local and regional shipping contributions in winter; (c) Local shipping contribution in summer; (d) Local and regional shipping contributions in summer. Base map credits: © OpenStreetMap contributors (openstreetmap.org). Distributed under a Creative Commons BY-SA License.**

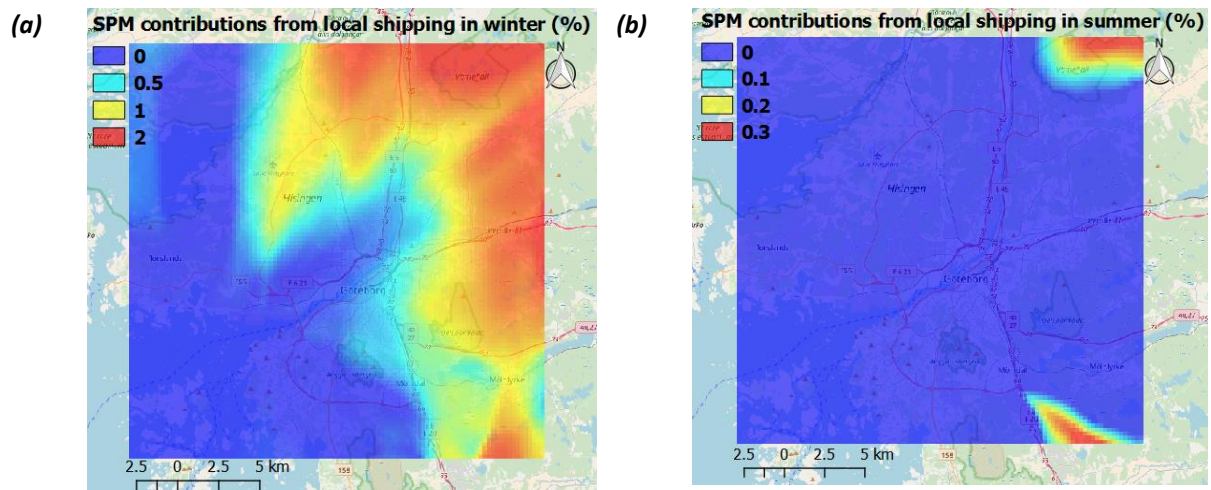

**S 4:** The contributions (%) of secondary particulate matter (SPM) from local shipping emissions corresponding to  $PM_{2.5}$  concentrations in (a) winter and (b) summer. Base map credits: © OpenStreetMap contributors (openstreetmap.org). Distributed under a Creative Commons BY-SA License.



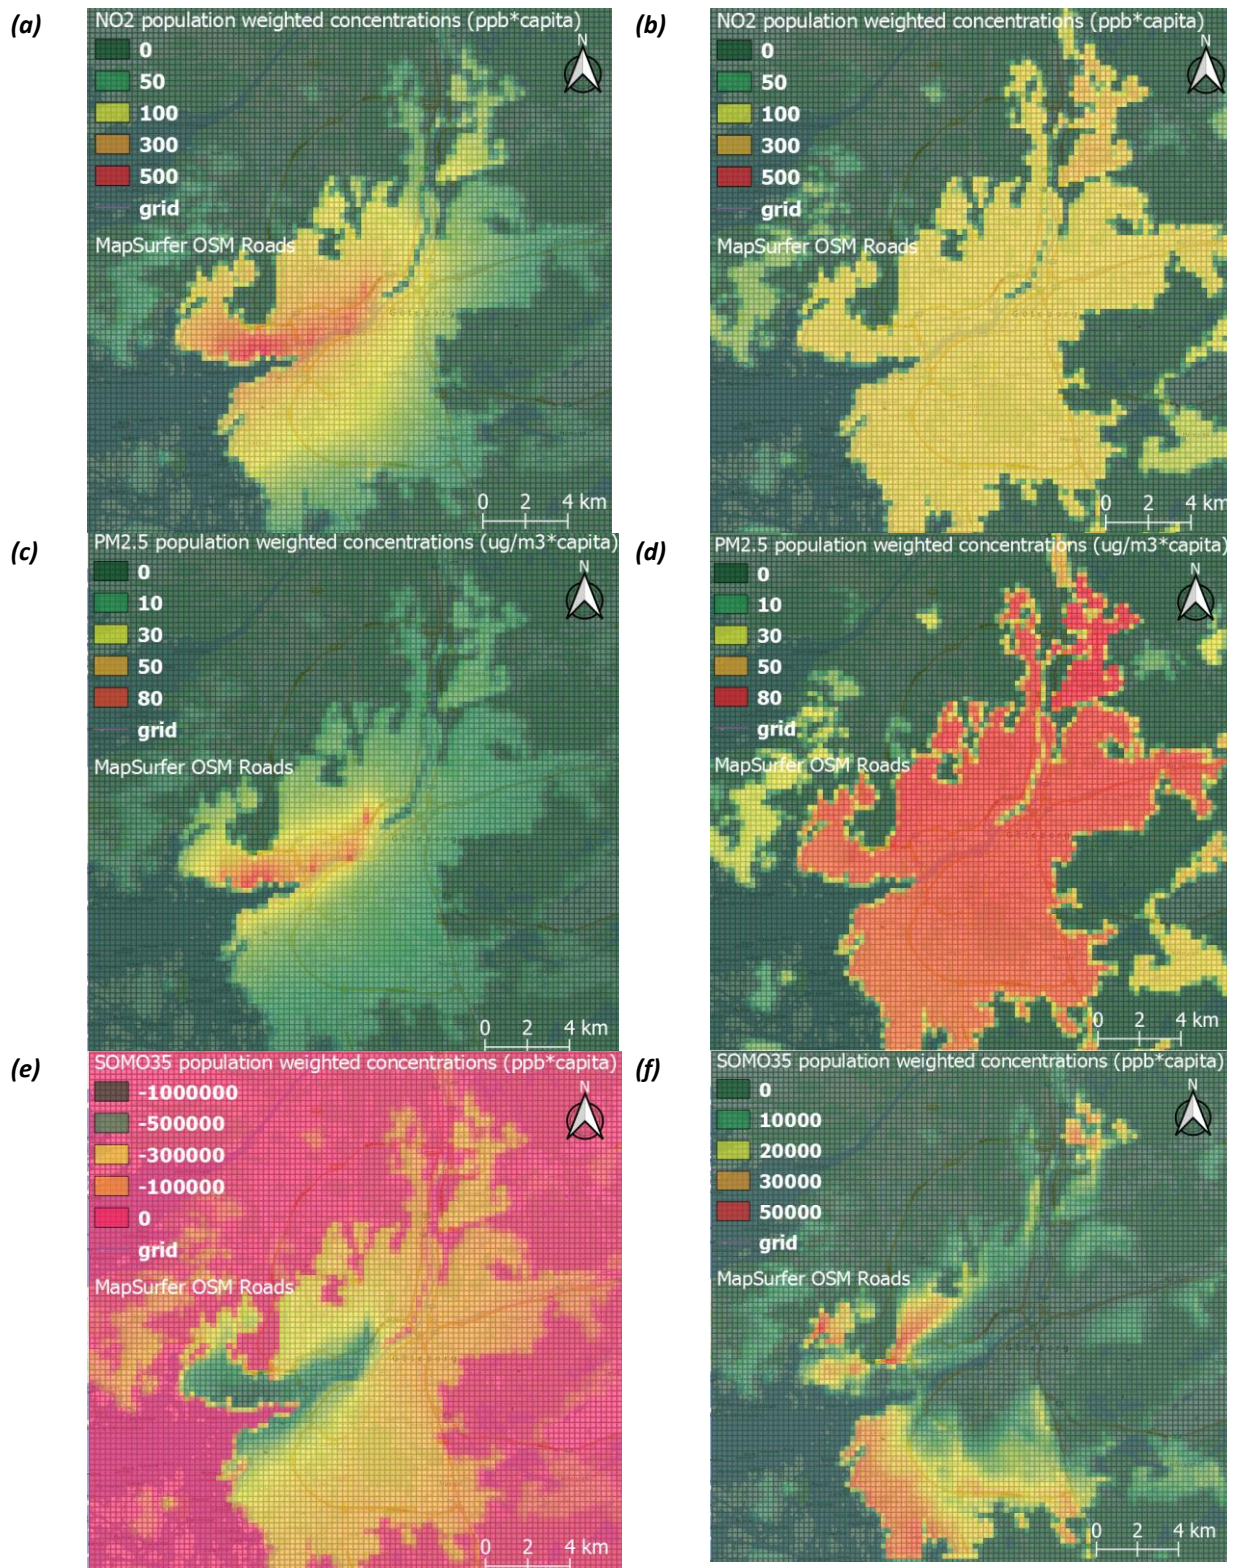

**S 5: The annual average population weighted concentrations for NO<sub>2</sub> (ppb × capita), PM<sub>2.5</sub> (μg m<sup>-3</sup> × capita) and SOMO35 (ppb × h × capita): (a) NO<sub>2</sub> from local shipping; (b) NO<sub>2</sub> from regional shipping; (c) PM<sub>2.5</sub> from local shipping; (d) PM<sub>2.5</sub> from regional shipping; (e) SOMO35 from local shipping; (f) SOMO35 from regional shipping. Base map credits: © OpenStreetMap contributors (openstreetmap.org). Distributed under a Creative Commons BY-SA License.**
